# Supplementary material for: Energy filtering enables macromolecular MicroED data at sub-atomic resolution
Source: Springer Nature journal article supplement (doi:10.1038/s41467-025-57425-1), 2025-03-06
Supplement: MOESM1 [file 41467_2025_57425_MOESM1_ESM.pdf]

# Supplementary Information

## Energy filtering enables macromolecular MicroED data at sub-atomic resolution

Max T.B. Clabbers<sup>1,2</sup>, Johan Hattne<sup>1,2</sup>, Michael W. Martynowycz<sup>2,†</sup> and Tamir Gonen<sup>1,2,3,\*</sup>

<sup>1</sup>Howard Hughes Medical Institute, University of California, Los Angeles, CA 90095

<sup>2</sup>Department of Biological Chemistry, University of California, Los Angeles, CA 90095

<sup>3</sup>Department of Physiology, University of California, Los Angeles, CA 90095

<sup>†</sup>Present address: Hauptman-Woodward Medical Research Institute, Buffalo, NY 14203; Department of Structural Biology, University at Buffalo, The State University of New York, Buffalo, NY 14203

\*Corresponding author. E-mail address: [tgonen@g.ucla.edu](mailto:tgonen@g.ucla.edu)

### **List of supplementary items**

Supplementary Table 1. Data processing and refinement statistics.

Supplementary Table 2. Comparison of data processing and refinement statistics of filtered and unfiltered MicroED data limited to 1.4 Å resolution.

Supplementary Figure 1. Unfiltered MicroED data.

Supplementary Figure 2. Radial averages of unfiltered and filtered MicroED data.

Supplementary Figure 3. Energy-filtered continuous rotation MicroED data.

Supplementary Figure 4. Intensity statistics for individual datasets.

**Supplementary Table 1. Data processing and refinement statistics.**

| <b>Data collection</b>                        |                                          |
|-----------------------------------------------|------------------------------------------|
| No. of crystals                               | 17                                       |
| Space group                                   | <i>P</i> 4 <sub>3</sub> 2 <sub>1</sub> 2 |
| Unit cell dimensions                          |                                          |
| <i>a</i> , <i>b</i> , <i>c</i> (Å)            | 66.92, 66.92, 107.56                     |
| $\alpha$ , $\beta$ , $\gamma$ (°)             | 90, 90, 90                               |
| Resolution (Å)*                               | 56.90-1.09 (1.12-1.09)                   |
| Observed reflections                          | 2,811,895 (95,185)                       |
| Unique reflections                            | 98,530 (6,664)                           |
| Multiplicity                                  | 28.5 (14.3)                              |
| Completeness (%)                              | 97.5 (90.3)                              |
| R <sub>merge</sub>                            | 0.284 (1.154)                            |
| $\langle I/\sigma I \rangle$                  | 7.8 (1.4)                                |
| CC <sub>1/2</sub> (%)                         | 99.5 (33.0)                              |
| <b>Refinement</b>                             |                                          |
| Resolution (Å)                                | 56.82-1.09                               |
| No. of reflections                            | 98,240                                   |
| R <sub>work</sub> /R <sub>free</sub>          | 0.1498/0.1831                            |
| No. of atoms                                  |                                          |
| Protein                                       | 2,197                                    |
| Ligand/ions                                   | 6                                        |
| Waters                                        | 334                                      |
| Hydrogen omit maps                            |                                          |
| No. of hydrogen atoms                         | 1,937                                    |
| Peaks at $\geq 3\sigma$                       | 767 (39.6%)                              |
| Peaks at $\geq 2\sigma$                       | 1,354 (69.9%)                            |
| $\langle B \rangle$ factors (Å <sup>2</sup> ) |                                          |
| Overall                                       | 11.29                                    |
| Protein                                       | 9.36                                     |
| Ligand/ions                                   | 10.86                                    |
| Waters                                        | 25.19                                    |
| R.m.s. deviations                             |                                          |
| Bond lengths (Å)                              | 0.012                                    |
| Bond angles (°)                               | 1.80                                     |

\*Values in parenthesis are for the highest resolution shell. Data were truncated at a mean  $I/\sigma I \geq 1.0$  and a cross correlation between two random half sets that is statistically significant at CC<sub>1/2</sub> ~ 33%.

**Supplementary Table 2. Comparison of data processing and refinement statistics of filtered and unfiltered MicroED data limited to 1.4 Å resolution.**

|                                                  | Unfiltered <sup>†</sup>                  | Unfiltered <sup>#</sup>                  | Filtered                                 |
|--------------------------------------------------|------------------------------------------|------------------------------------------|------------------------------------------|
| <b>Data collection</b>                           |                                          |                                          |                                          |
| No. of crystals                                  | 5                                        | 12                                       | 17                                       |
| Rotation range (°)                               | 63.0                                     | 20.0                                     | 20.0                                     |
| Flux density (e <sup>-</sup> /Å <sup>2</sup> /s) | 0.002                                    | 0.002                                    | 0.002                                    |
| Fluence (e <sup>-</sup> /Å <sup>2</sup> )        | 1.00                                     | 0.84                                     | 0.84                                     |
| Dose (MGy) <sup>‡</sup>                          | 3.66                                     | 3.08                                     | 3.08                                     |
| <b>Data integration</b>                          |                                          |                                          |                                          |
| Space group                                      | <i>P</i> 4 <sub>3</sub> 2 <sub>1</sub> 2 | <i>P</i> 4 <sub>3</sub> 2 <sub>1</sub> 2 | <i>P</i> 4 <sub>3</sub> 2 <sub>1</sub> 2 |
| Unit cell dimensions                             |                                          |                                          |                                          |
| <i>a</i> , <i>b</i> , <i>c</i> (Å)               | 67.02, 67.02, 107.53                     | 67.62, 67.62, 106.59                     | 66.92, 66.92, 107.56                     |
| <i>α</i> , <i>β</i> , <i>γ</i> (°)               | 90, 90, 90                               | 90, 90, 90                               | 90, 90, 90                               |
| Resolution (Å)*                                  | 19.55-1.40 (1.45-1.40)                   | 57.10-1.40 (1.44-1.40)                   | 56.90-1.40 (1.44-1.40)                   |
| Observed reflections                             | 1,231,502 (69,985)                       | 1,101,042 (82,782)                       | 1,371,884 (108,136)                      |
| Unique reflections                               | 47,744 (3,442)                           | 47,420 (3,467)                           | 47,927 (3,494)                           |
| Multiplicity                                     | 25.8 (20.7)                              | 23.4 (23.9)                              | 28.6 (30.9)                              |
| Completeness (%)                                 | 97.3 (96.2)                              | 96.0 (96.3)                              | 98.2 (98.4)                              |
| R <sub>merge</sub>                               | 0.324 (1.784)                            | 0.441 (1.987)                            | 0.226 (0.598)                            |
| < <i>I</i> /σ <i>I</i> >                         | 7.6 (1.4)                                | 6.2 (1.4)                                | 12.1 (5.3)                               |
| CC <sub>1/2</sub> (%)                            | 99.4 (27.0)                              | 95.9 (23.2)                              | 99.4 (85.7)                              |
| <b>Refinement</b>                                |                                          |                                          |                                          |
| Resolution (Å)                                   | 19.77-1.40                               | 57.10-1.40                               | 56.82-1.40                               |
| No. of reflections                               | 47,738                                   | 46,737                                   | 47,907                                   |
| R <sub>work</sub> /R <sub>free</sub>             | 0.1374/0.1735                            | 0.1538/0.1856                            | 0.1208/0.1427                            |
| No. of atoms                                     |                                          |                                          |                                          |
| Protein                                          | 2,063                                    | 2,197                                    | 2,197                                    |
| Ligand/ions                                      | 10                                       | 6                                        | 6                                        |
| Waters                                           | 307                                      | 334                                      | 334                                      |
| < <i>B</i> > factors (Å <sup>2</sup> )           |                                          |                                          |                                          |
| Overall                                          | 14.47                                    | 12.19                                    | 10.61                                    |
| Protein                                          | 12.51                                    | 10.11                                    | 8.52                                     |
| Ligand/ions                                      | 27.44                                    | 10.15                                    | 10.19                                    |
| Waters                                           | 27.21                                    | 25.92                                    | 24.39                                    |
| R.m.s. deviations                                |                                          |                                          |                                          |
| Bond lengths (Å)                                 | 0.015                                    | 0.016                                    | 0.013                                    |
| Bond angles (°)                                  | 1.10                                     | 1.80                                     | 1.79                                     |

<sup>†</sup>Unfiltered MicroED data collected from 63° sweeps were previously published in Martynowycz *et al.*, 2023.

<sup>#</sup>An equivalent unfiltered MicroED dataset collected utilizing a 20° sweeps strategy, identical to the filtered data.

\*Values in parenthesis are for the highest resolution shell. For an equal comparison, all data were truncated at 1.4 Å resolution.

<sup>‡</sup> Calculated with the EMED subprogram of RADDOS-3D (5.0.1047)<sup>20</sup>.

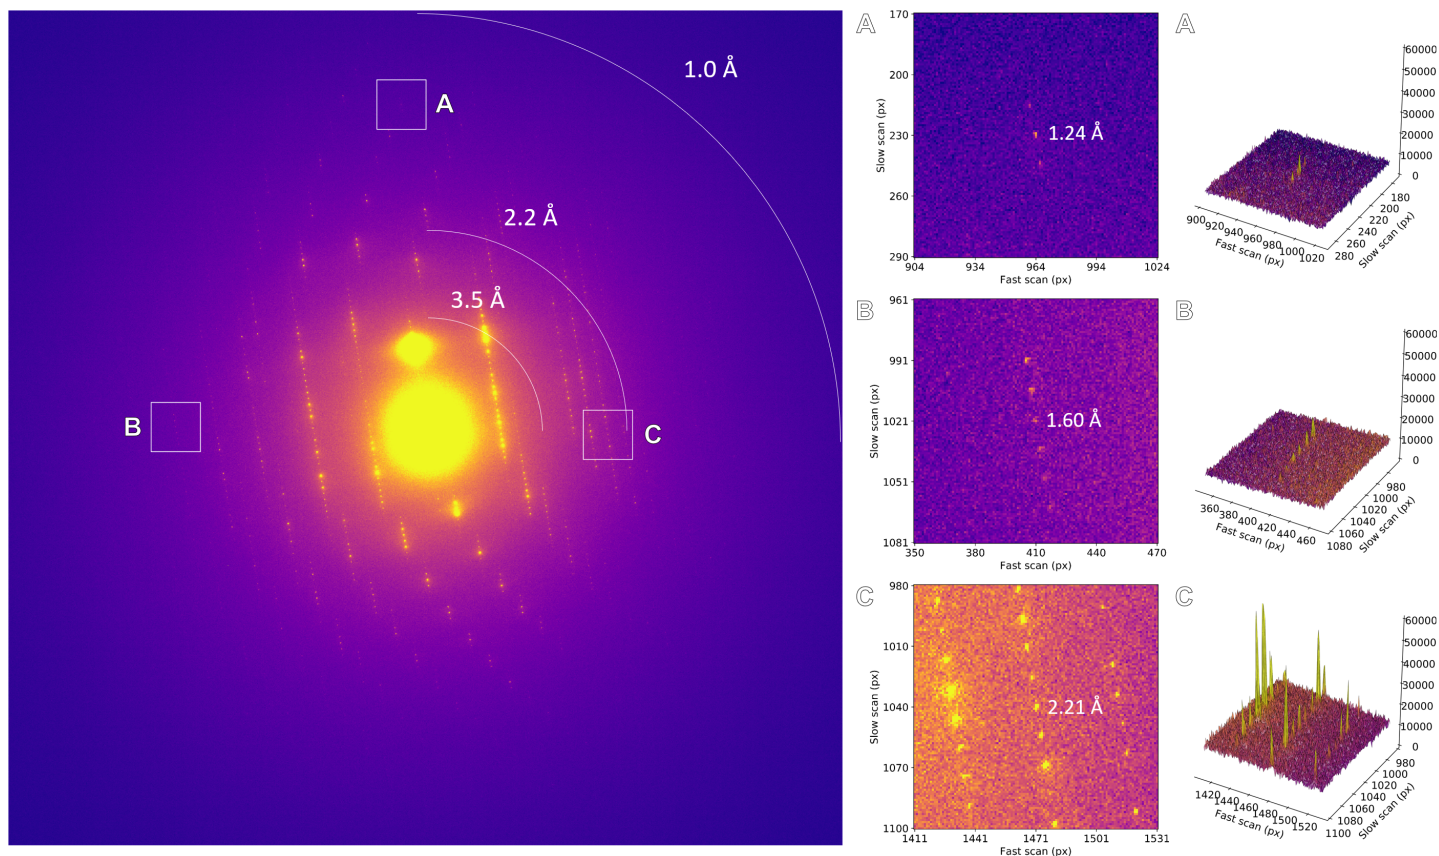



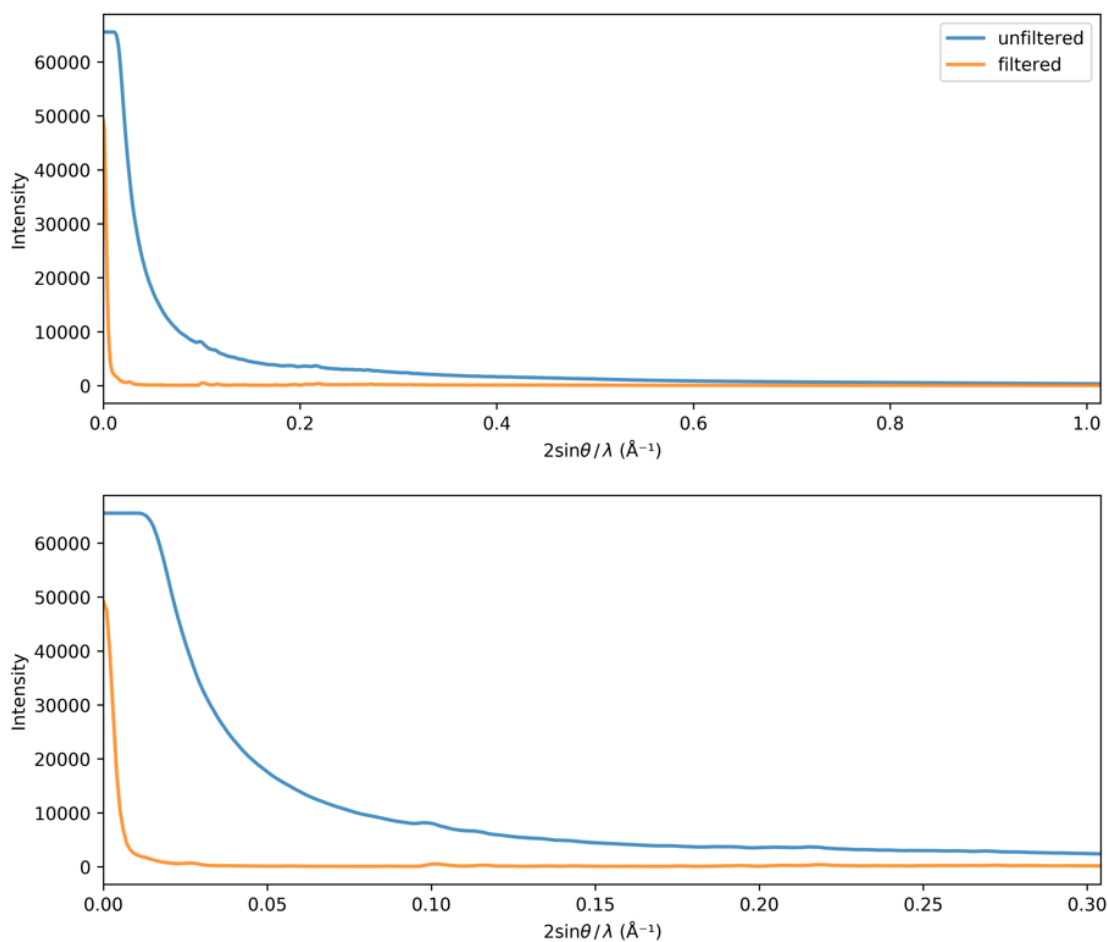

**Supplementary Figure 2. Radial averages of unfiltered and filtered MicroED data.** Radial averages of an energy-filtered diffraction frame (shown in Figure 1) and unfiltered data (shown in Supplementary Figure 1). Top: radial plots extending from the center peak to the edge of the detector, at approximately 1  $\text{\AA}$  resolution. Bottom: Same radial plots focusing on the lower angle data, extending to  $\sim 3$   $\text{\AA}$  resolution.

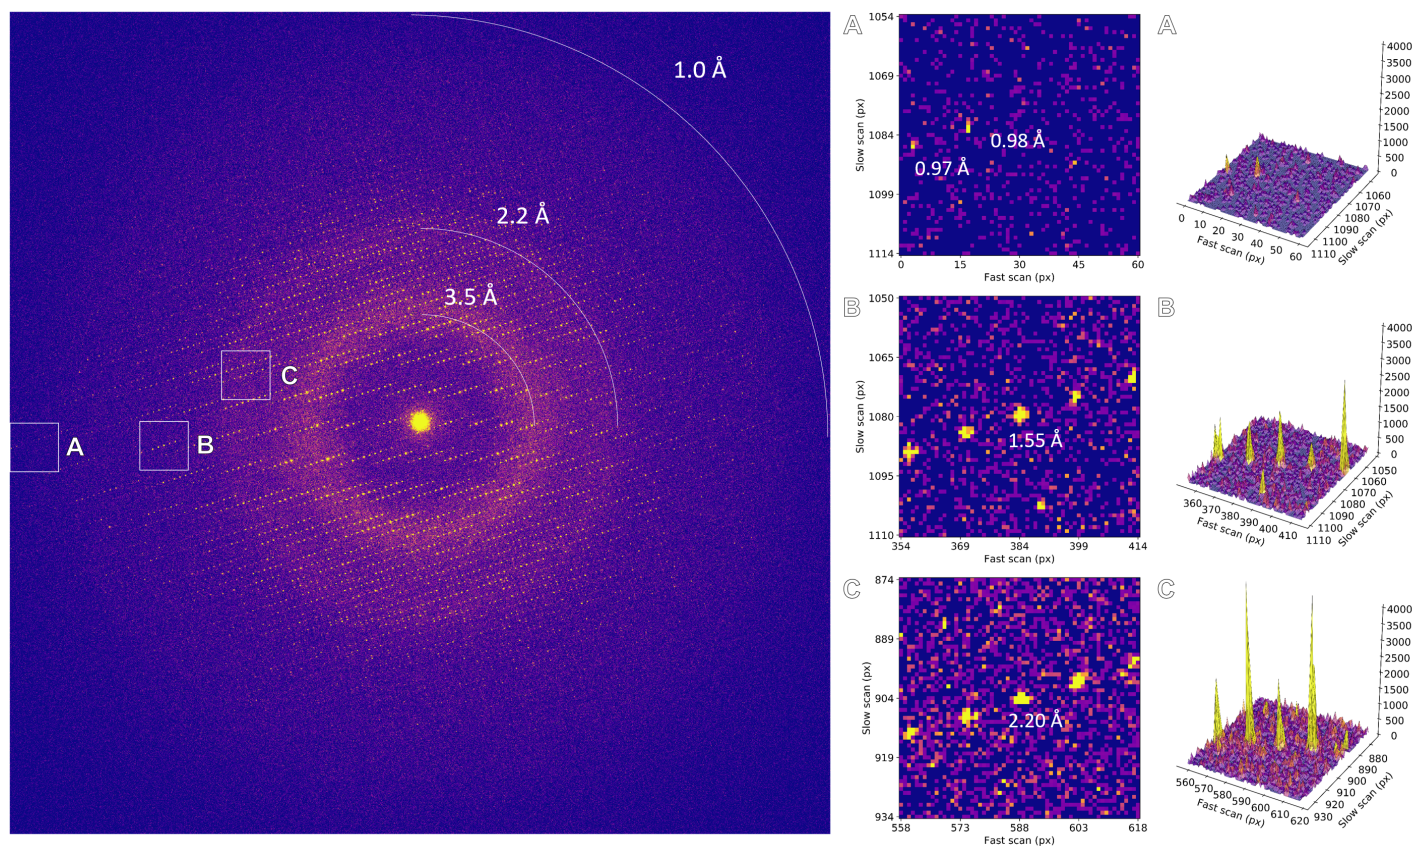

**Supplementary Figure 3. Energy-filtered continuous rotation MicroED data.** Initial frame from energy-filtered and electron-counted MicroED data collection with a 5 s exposure time and a total fluence of  $0.01 \text{ e}^-/\text{\AA}^2$ . Highlighted areas are magnified in the right panels and the corresponding peak profiles are plotted.

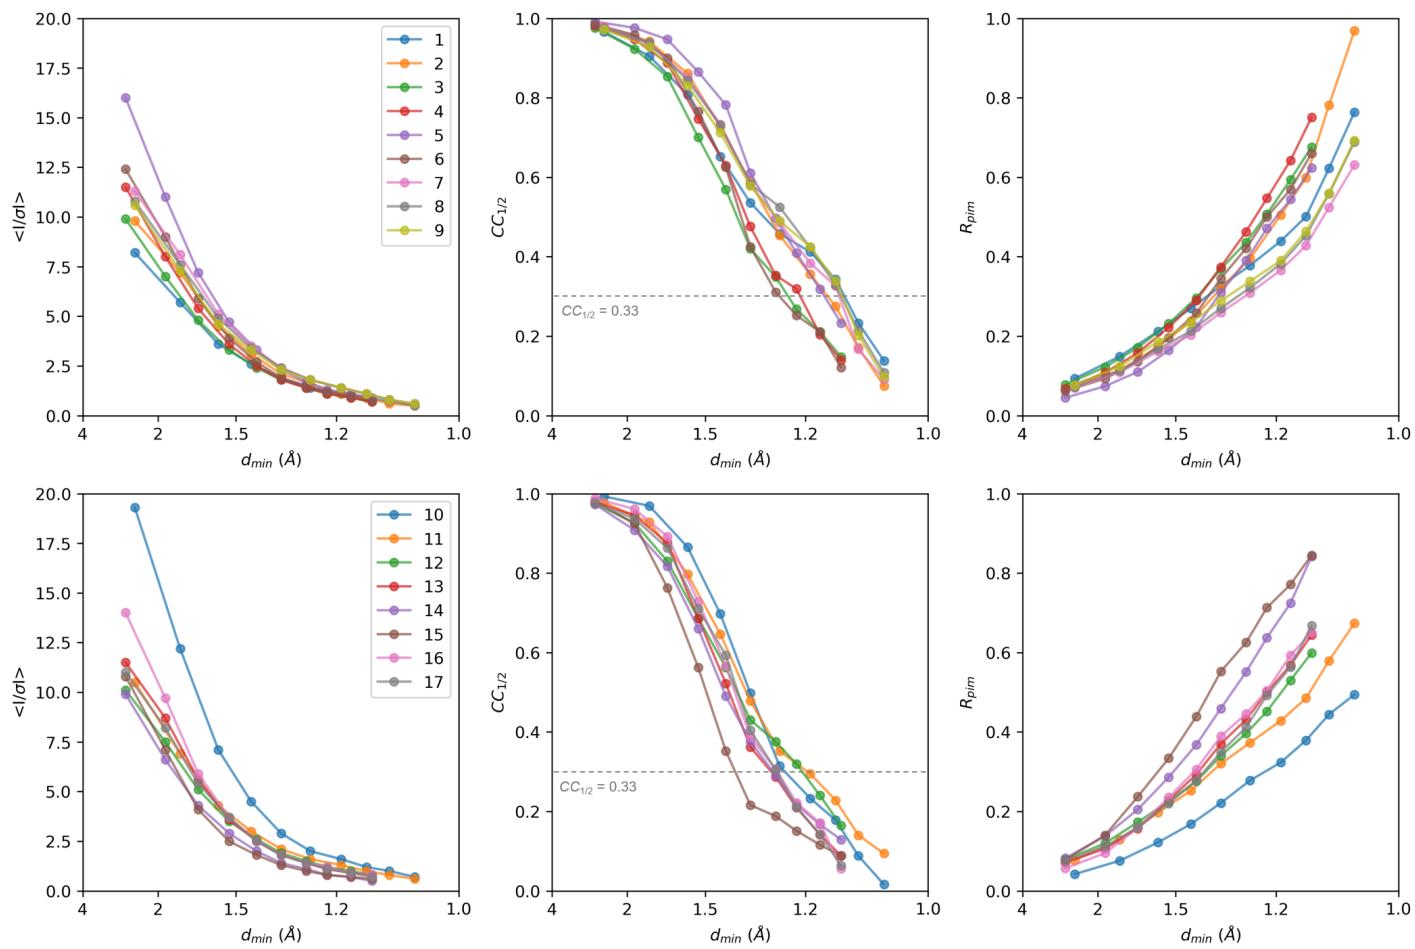

**Supplementary Figure 4. Intensity statistics for individual datasets.** Intensity statistics for individual MicroED datasets, featuring from left to right  $I/\sigma$ ,  $CC_{1/2}$ , and  $R_{pim}$  as function of resolution. Individual datasets were truncated ranging from 1.13 to 1.06 Å resolution at a  $CC_{1/2}$  that was still significant at the 0.1% level.
